# Supplementary material for: Neuropathological changes in the substantia nigra in schizophrenia but not depression
Source: Springer Nature journal article supplement (doi:10.1007/s00406-013-0479-z), 2013-12-28
Supplement: MOESM1 [file 8440982]

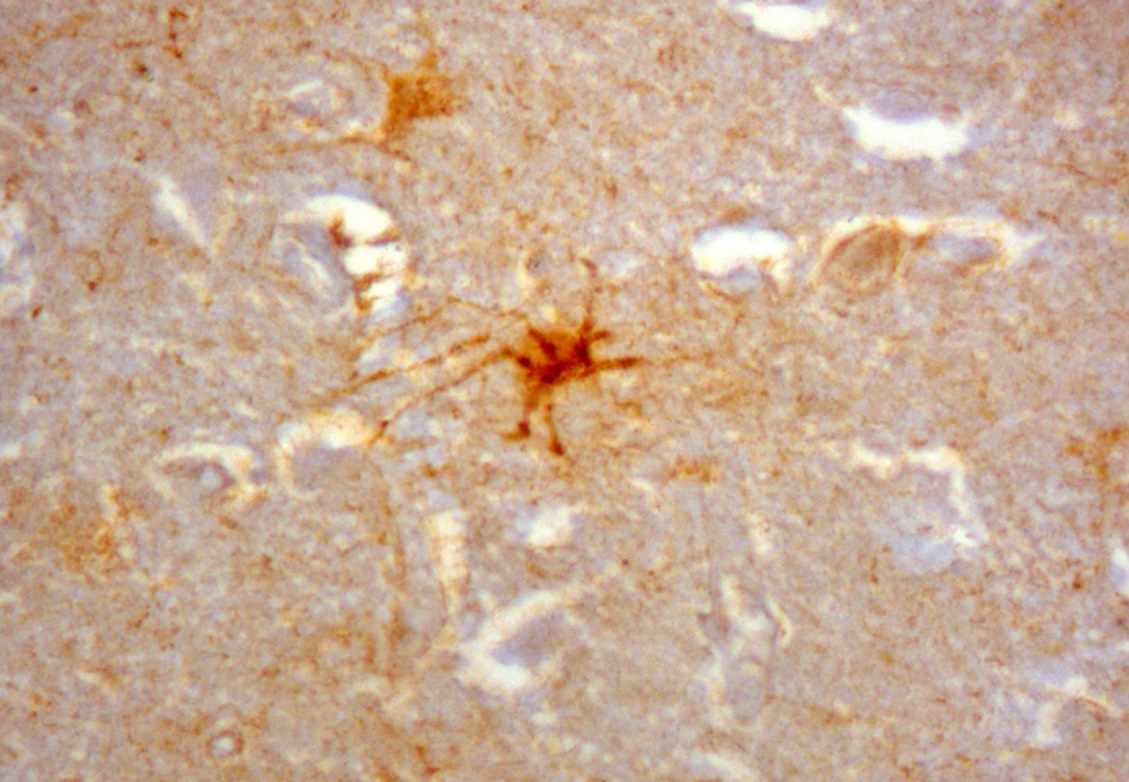


**Supplementary Image 1. A GFAP-reactive fibrillary astrocyte.**


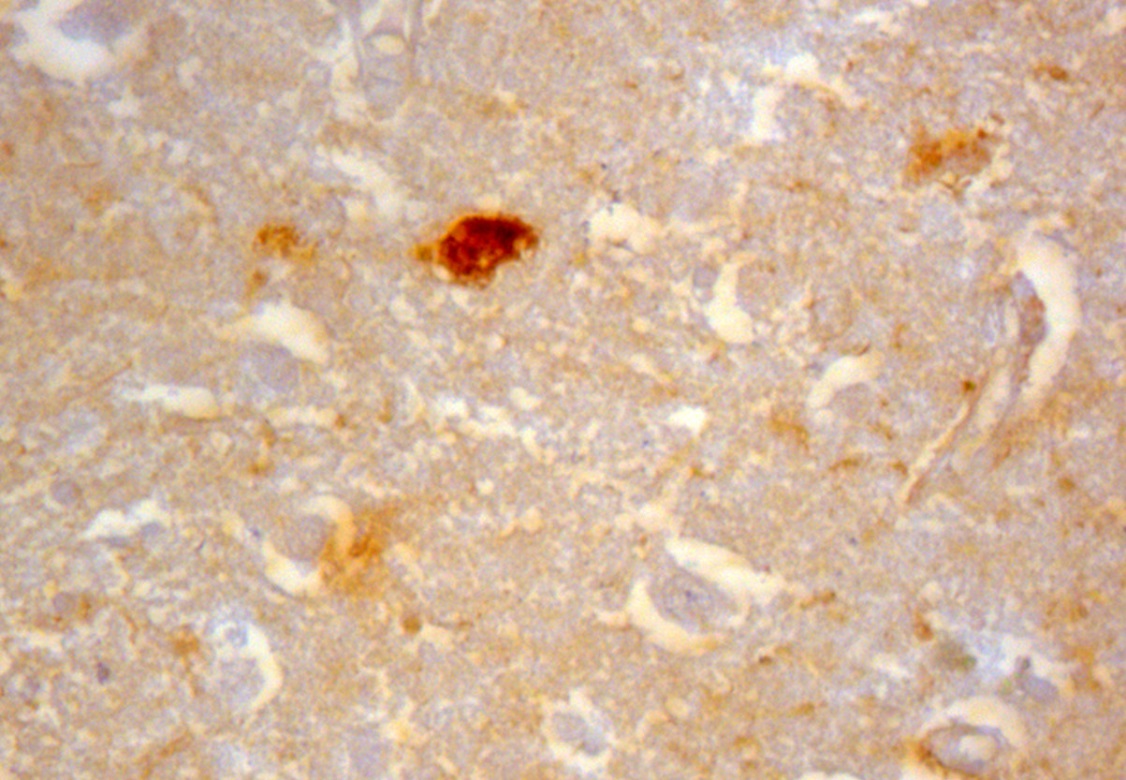


**Supplementary Image 1. A GFAP-reactive gemistocytic astrocyte.**
